# Supplementary material for: Mutation in OsFWL7 Affects Cadmium and Micronutrient Metal Accumulation in Rice
Source: MDPI journal article supplement (doi:10.3390/ijms222212583), 2021-11-22
Supplement: s1 [file s1]

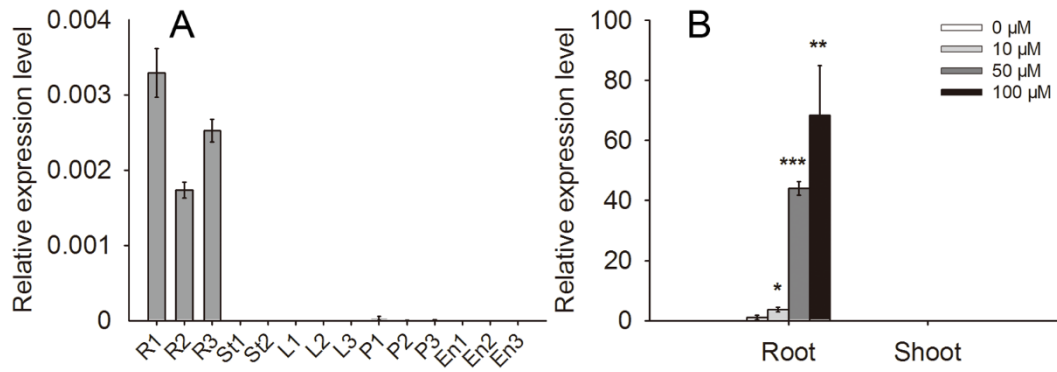

**Figure S1.** RT-qPCR results of *OsFWL7* gene in different tissues and under Cd treatments using the rice ubiquitin gene as a reference. **(A)** RT-qPCR results of *OsFWL7* in 14 tissue samples of *Oryza sativa* L. ssp. *japonica* variety Zhonghua 11. The tissues used were as follows: seedling, tillering, and heading stage roots (R1–R3); jointing and heading stage stems (St1 and St2); seedling, tillering, and heading stage leaves (L1–L3); 5-, 15-, and 20-cm panicles (P1–P3); and endosperms 5, 14, and 21 days after pollination (En1–En3). Error bars indicate the standard deviation of three technical replicates. **(B)** RT-qPCR results of *OsFWL7* under treatment with Cd of different concentrations. Error bars indicate the standard deviation of three biological replicates. \* $p < 0.05$ , \*\* $p < 0.01$ , \*\*\* $p < 0.001$ .

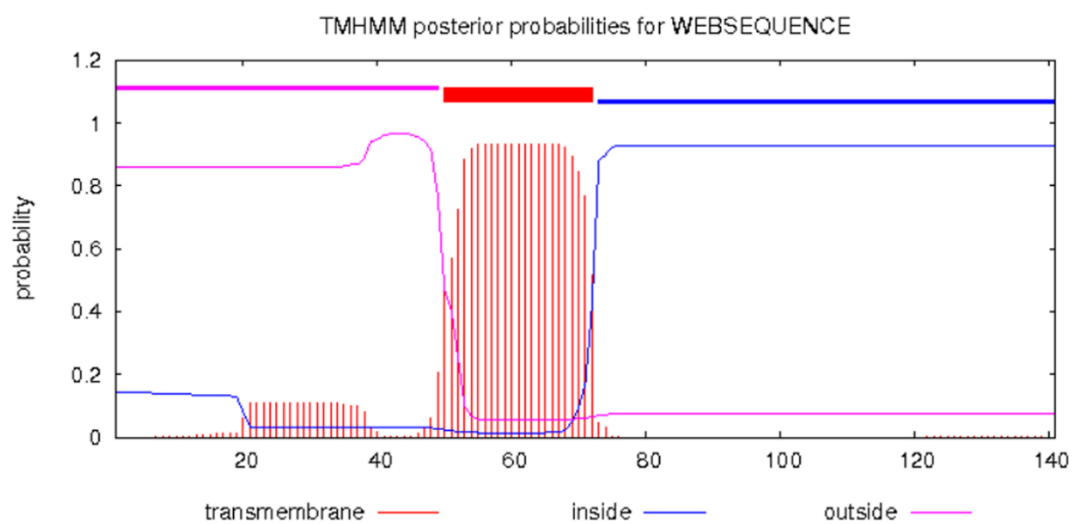

**Figure S2.** Prediction of transmembrane helices in OsFWL7 using TMHMM Server v. 2.0.

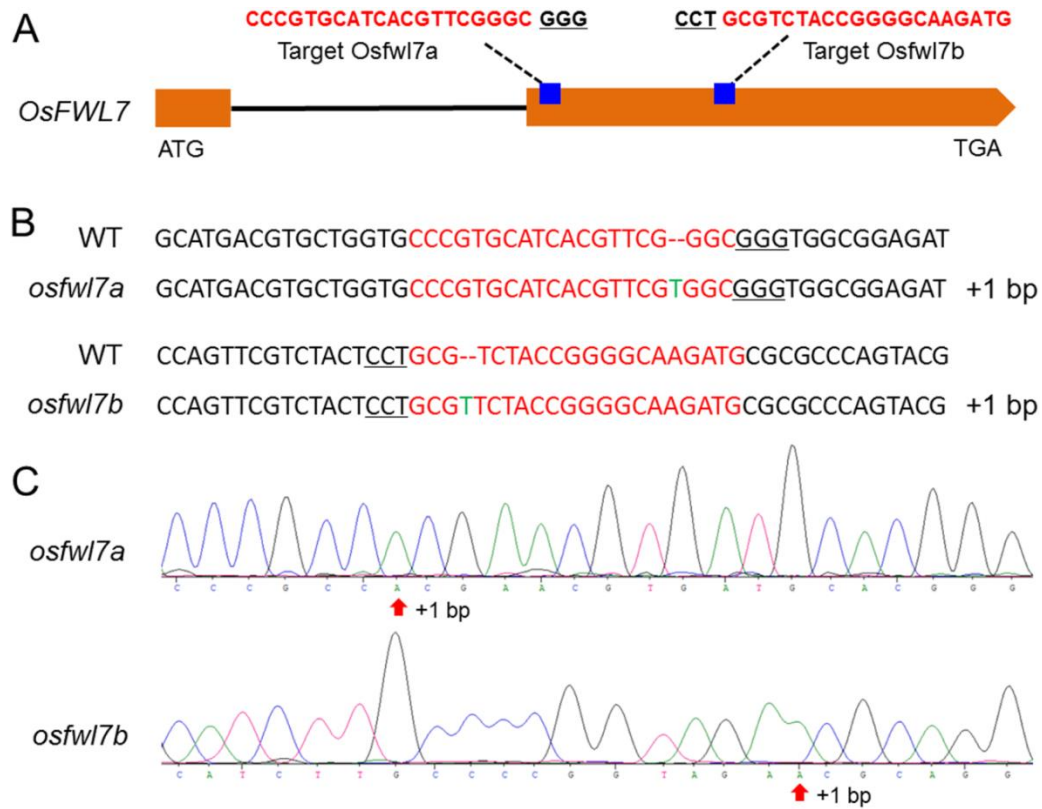

**Figure S3.** Molecular identification of *OsFWL7* mutants generated through CRISPR/Cas9 genome editing. **(A)** Schematic diagram of the two target sites in *OsFWL7*. **(B)** Genotypes of *osfwl7a* and *osfwl7b* mutants. **(C)** Sequencing chromatograms of *osfwl7a* and *osfwl7b* mutants.

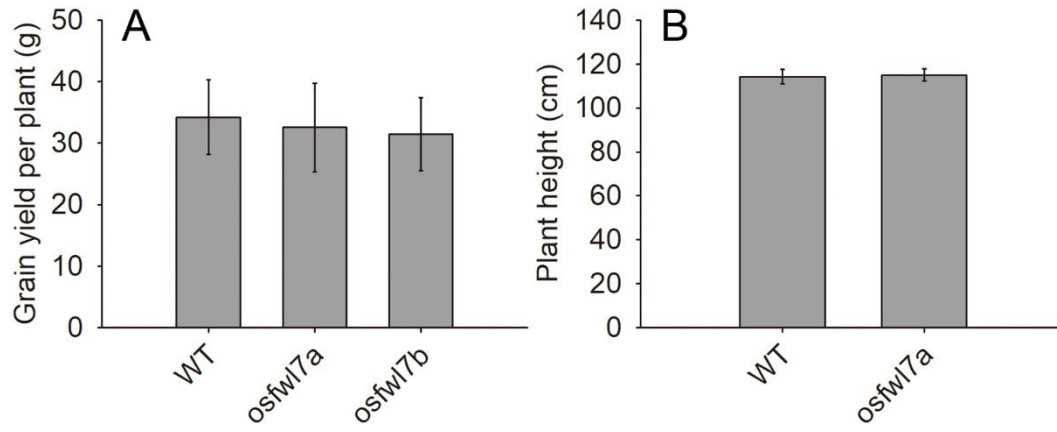

**Figure S4.** The grain yield per plant (A) and plant height (B) of the wildtype (WT) and *osfwl7* mutants. The values in (A) and (B) are means  $\pm$  standard deviation of 10 and 15 plants, respectively.

**Table S1.** Primers used in this study.

| Experiment               | Primer name    | Sequence (5' to 3')                          |
|--------------------------|----------------|----------------------------------------------|
| Subcellular localization | OsFWL7SL-F     | CGGAGCTAGCTCTAGAATGGCCAAGCCAAGCGCCGC         |
|                          | OsFWL7SL-R     | TGCTCACCATGGATCCACGGCCCATGTGCTGCACGG         |
| Yeast two-hybrid assay   | OsFWL1AD-F     | GGAGGCCAGTGAATTCATGTATCCCTCCGCCCTCC          |
|                          | OsFWL1AD-R     | CGAGCTCGATGGATCCCTACCTCATCATGCCGACCG         |
|                          | OsFWL2AD-F     | GGAGGCCAGTGAATTCATGTACTCGAAACCGGAGGA         |
|                          | OsFWL2AD-R     | CGAGCTCGATGGATCCTCAGCGTGTCTATCCCGGGGA        |
|                          | OsFWL3AD-F     | GGAGGCCAGTGAATTCATGCAGGACCAGGCCGCCCC         |
|                          | OsFWL3AD-R     | CGAGCTCGATGGATCCTCAGCGTGTCTATCCCAGGGT        |
|                          | OsFWL4AD-F     | GGAGGCCAGTGAATTCATGGCGAGGCCGCAACACAA         |
|                          | OsFWL4AD-R     | CGAGCTCGATGGATCCTTAGCGTCGCATCGGCGGGT         |
|                          | OsFWL5AD-F     | GGAGGCCAGTGAATTCATGTATCCCCCTGATCCGTC         |
|                          | OsFWL5AD-R     | CGAGCTCGATGGATCCTTATGAGGGAGTTGTCATTC         |
|                          | OsFWL6AD-F     | GGAGGCCAGTGAATTCATGGCCAAGCCAAGCGCCGC         |
|                          | OsFWL6AD-R     | CGAGCTCGATGGATCCTTAGCGGCCCATGTACTGCA         |
|                          | OsFWL7AD-F     | GGAGGCCAGTGAATTCATGGCCAAGCCAAGCGCCGC         |
|                          | OsFWL7AD-R     | CGAGCTCGATGGATCCTTAACGGCCCATGTGCTGCA         |
|                          | LP1AD-F        | GGAGGCCAGTGAATTCATGGAGAGAATGCGGTGTGT         |
|                          | LP1AD-R        | CGAGCTCGATGGATCCCTAGAAAGGCATGGCAAGTGA        |
|                          | GSD1AD-F       | GGAGGCCAGTGAATTCATGGAGTATGAAAGGATTCA         |
|                          | GSD1AD-R       | CGAGCTCGATGGATCCCTAGTGTGACAGAAGCAAC          |
|                          | Os04g38900AD-F | GGAGGCCAGTGAATTCATGGCCGGCGGTCCCGCGGC         |
|                          | Os04g38900AD-R | CGAGCTCGATGGATCCTCACCGGCCGAACCCGGCAG         |
|                          | Os03g62490AD-F | GGAGGCCAGTGAATTCATGAACTTCAAGGGCGCGAA         |
|                          | Os03g62490AD-R | CGAGCTCGATGGATCCTCACTTCTTGTTTTGTGT           |
|                          | OsFWL1BD-F     | CATGGAGGCCGAATTCATGTATCCCTCCGCCCTCC          |
|                          | OsFWL1BD-R     | GCAGGTCGACGGATCCCTACCTCATCATGCCGACCG         |
|                          | OsFWL2BD-F     | CATGGAGGCCGAATTCATGTACTCGAAACCGGAGGA         |
|                          | OsFWL2BD-R     | GCAGGTCGACGGATCCTCAGCGTGTCTATCCCGGGGA        |
|                          | OsFWL3BD-F     | CATGGAGGCCGAATTCATGCAGGACCAGGCCGCCCC         |
|                          | OsFWL3BD-R     | GCAGGTCGACGGATCCTCAGCGTGTCTATCCCAGGGT        |
|                          | OsFWL4BD-F     | CATGGAGGCCGAATTCATGGCGAGGCCGCAACACAA         |
|                          | OsFWL4BD-R     | GCAGGTCGACGGATCCTTAGCGTCGCATCGGCGGGT         |
|                          | OsFWL5BD-F     | CATGGAGGCCGAATTCATGTATCCCCCTGATCCGTC         |
|                          | OsFWL5BD-R     | GCAGGTCGACGGATCCTTATGAGGGAGTTGTCATTC         |
|                          | OsFWL6BD-F     | CATGGAGGCCGAATTCATGGCCAAGCCAAGCGCCGC         |
|                          | OsFWL6BD-R     | GCAGGTCGACGGATCCTTAGCGGCCCATGTACTGCA         |
|                          | OsFWL7BD-F     | CATGGAGGCCGAATTCATGGCCAAGCCAAGCGCCGC         |
|                          | OsFWL7BD-R     | GCAGGTCGACGGATCCTTAACGGCCCATGTGCTGCA         |
| BiFC assay               | FWL7YN-F       | CATTTACGAACGATAGTTAATTAAATGGCCAAGCCAAGCGCCGC |
|                          | FWL7YN-R       | CACTGCCACCTCCTCCACTAGTACGGCCCATGTGCTGCACGG   |
|                          | FWL7YC-F       | CATTTACGAACGATAGTTAATTAAATGGCCAAGCCAAGCGCCGC |
|                          | FWL7YC-R       | CACTGCCACCTCCTCCACTAGTACGGCCCATGTGCTGCACGG   |

|                  |                |                                              |
|------------------|----------------|----------------------------------------------|
| RT-qPCR analysis | Os04g38900YC-F | CATTTACGAACGATAGTTAATTAAATGGCCGGCGGTCCCGCGGC |
|                  | Os04g38900YC-R | CACTGCCACCTCCTCCACTAGTCCGGCCGAACCCGGCAGCGT   |
|                  | Os03g62490YC-F | CATTTACGAACGATAGTTAATTAAATGAACTTCAAGGGCGCGAA |
|                  | Os03g62490YC-R | CACTGCCACCTCCTCCACTAGTCTTCTTGTGTTTTGTTGTCCA  |
|                  | OsFWL1F        | GATTTCTCTCGTCCATTCTGC                        |
|                  | OsFWL1R        | GTTCGCCATCTTCGTCTACCT                        |
|                  | OsFWL2F        | AGCCAGATTTTTCTTGCGG                          |
|                  | OsFWL2R        | GGAACCGAGGGAAACCAA                           |
|                  | OsFWL3F        | GGCACGCAAACATGGAGAA                          |
|                  | OsFWL3R        | AGAGAAGACAACGACCGAGCA                        |
|                  | OsFWL4F        | ATGACTGCGAAGTTTGTGCT                         |
|                  | OsFWL4R        | CCCCTCGACACGATCTCC                           |
|                  | OsFWL6F        | GGGGAAGAAAAGTAGGAGGAGA                       |
|                  | OsFWL6R        | CAGCACGTCAAGCAGCATAG                         |
|                  | OsFWL7F        | GGCGAAGGAAATTAAAGGAAAG                       |
|                  | OsFWL7R        | GGTAGACGCAGGAGTAGACGAA                       |
|                  | OsNramp3F      | CACACAAATTCAAAAAGCCATTTCTG                   |
|                  | OsNramp3R      | CGATAGACCGTTGTGGAGAAGC                       |
|                  | OsNramp5F      | CAGCAGCAGTAAGAGCAAGATG                       |
|                  | OsNramp5R      | GTGCTCAGGAAGTACATGTTGAT                      |
|                  | OsNramp6F      | CATAGCTGCGATTGTACTATCATTTG                   |
|                  | OsNramp6R      | CGCGATTCCGATAATAGATGTTG                      |
|                  | OsHMA2F        | CATAGTGAAGCTGCCTGAGATC                       |
|                  | OsHMA2R        | GATCAAACGCATAGCAGCATCG                       |
|                  | OsHMA5F        | AAGGTGGAGAGTATAATGGTGAC                      |
|                  | OsHMA5R        | CCTTCCGGCCGACTGAAGTTC                        |
|                  | OsCOPT5F       | GCTGTCTCGCTCGTCATGGT                         |
|                  | OsCOPT5R       | CGCACACACAAAACATCAACAA                       |
|                  | ActinRT-F      | CTTGGCATCTCTCAGCACATT                        |
|                  | ActinRT-R      | TTGGCTTAGCATTCTTGGGT                         |
|                  | Ubiquitin-F    | AACCAGCTGAGGCCCAAGA                          |
|                  | Ubiquitin-R    | ACGATTGATTAAACCAGTCCATGA                     |
